# Supplementary material for: Designed synthesis of sulfonated polystyrene/mesoporous silica hollow nanospheres as efficient solid acid catalysts
Source: Royal Society of Chemistry journal article supplement (doi:10.1039/c4ta00241e), 2014-01-01
Supplement: c4ta00241e1.pdf [file c4ta00241e1.pdf]

**Designed Synthesis of Sulfonated Polystyrene/Mesoporous Silica  
Hollow Nanospheres as Efficient Solid Acid Catalysts**

Xiaomin Zhang<sup>a,b</sup>, Lei Zhang<sup>a</sup>, and Qihua Yang<sup>\*a</sup>

<sup>a</sup> State Key Laboratory of Catalysis, Dalian Institute of Chemical Physics, Chinese Academy of Sciences, 457 Zhongshan Road, Dalian 116023, China. E-mail: yangqh@dicp.ac.cn; Web: <http://www.hmm.dicp.ac.cn>; Tel: 86-411-84379552. Fax: 86-411-84694447.

<sup>b</sup> University of Chinese Academy of Sciences, Beijing 100049, China.

## Supplementary Materials

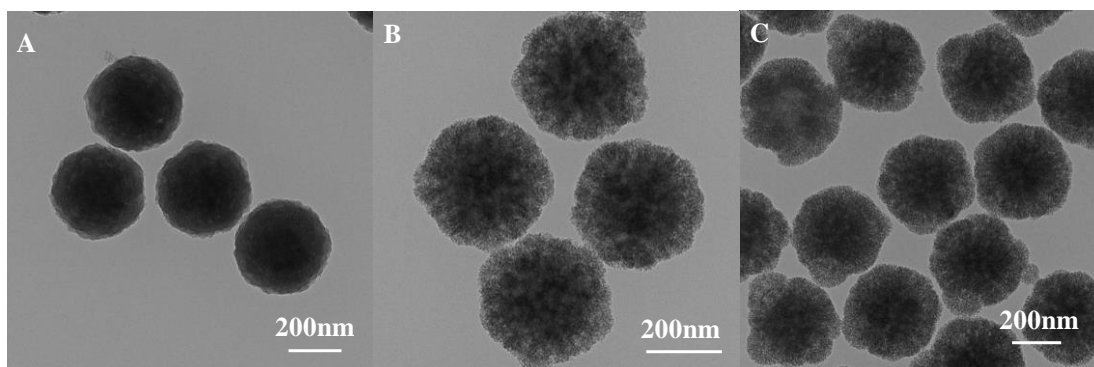

Figure S1. TEM images of PS/SiO<sub>2</sub> CSNs (A), PS/2.5PMA-SiO<sub>2</sub> CSNs (B) and PS/3.3PMA-SiO<sub>2</sub> CSNs (C).

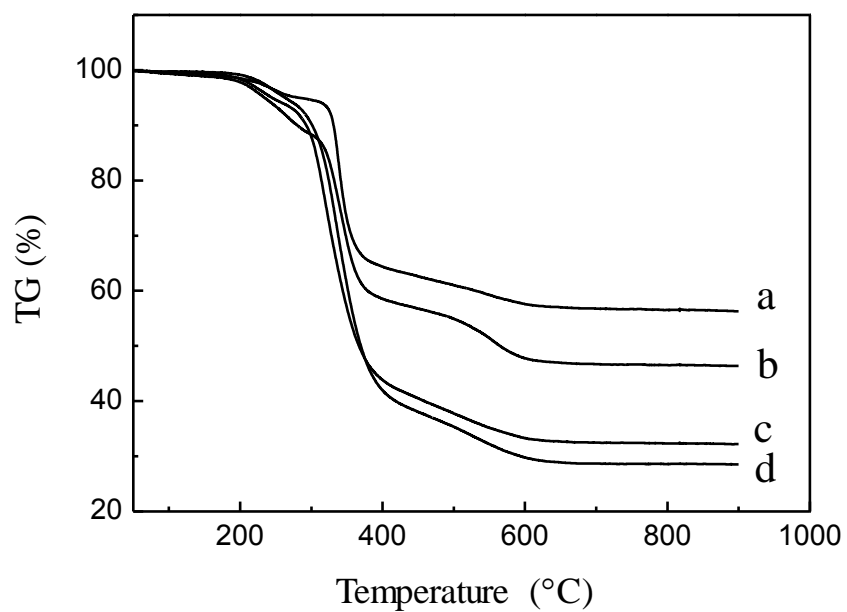

Figure S2. TG curves of the samples for PS/SiO<sub>2</sub> HN (a), PS/SiO<sub>2</sub> HN after THF extraction (b), PS/5PMA-SiO<sub>2</sub> HN (c) and PS/5PMA-SiO<sub>2</sub> HN after THF extraction (d).

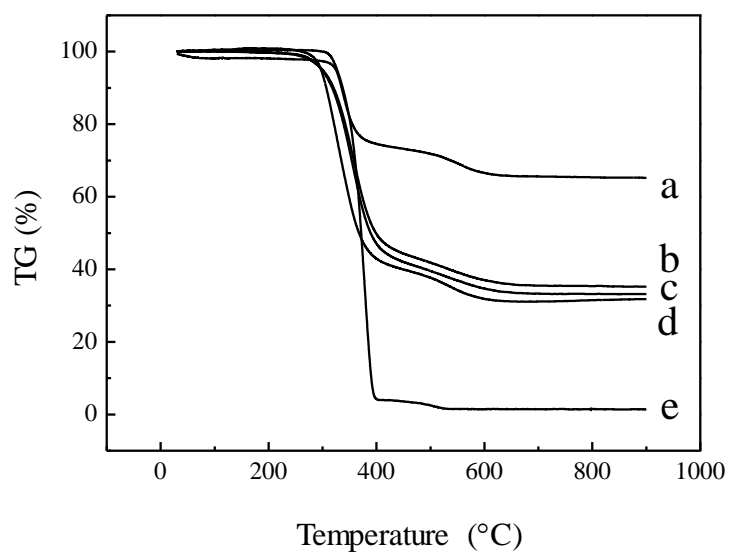

Figure S3. TG curves of the samples for PS@SiO<sub>2</sub> HNs (a), PS/5PMA-SiO<sub>2</sub> HNs (b), PS/3.3PMA-SiO<sub>2</sub> HNs (c), PS/2.5PMA-SiO<sub>2</sub> HNs (d) and PS template nanospheres (e).

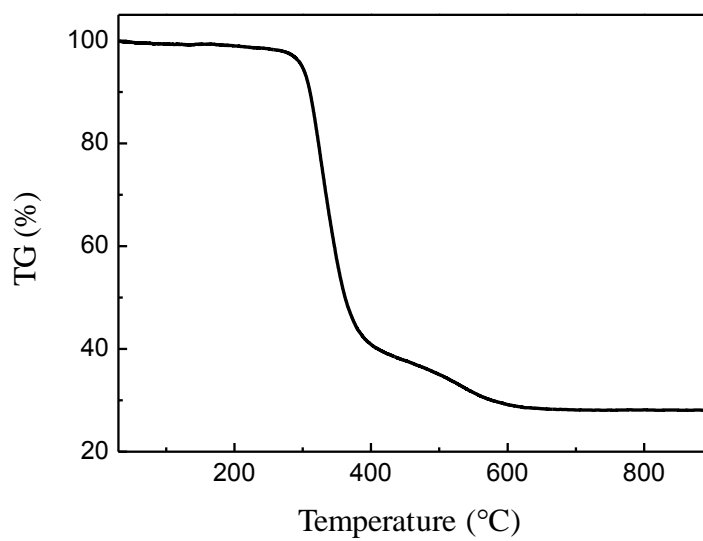

Figure S4. TG curves of the samples for PS/2.5 PMA-C8-SiO<sub>2</sub> HNs

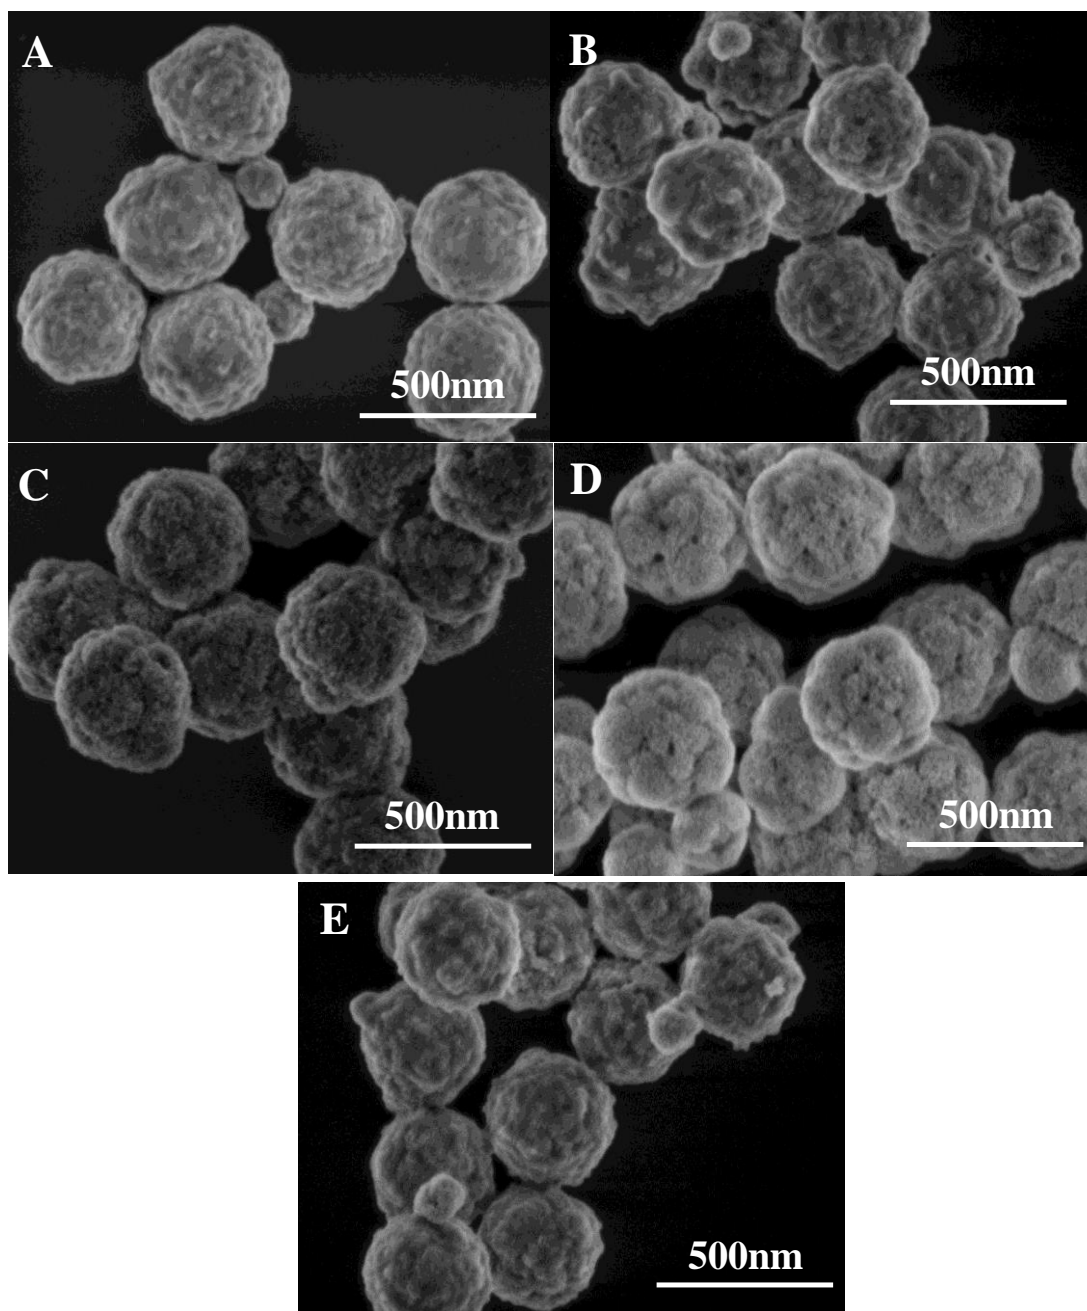

Figure S5. HR-SEM images of PS-SO<sub>3</sub>H/SiO<sub>2</sub> HNAs (A), PS-SO<sub>3</sub>H/2.5PMA-SiO<sub>2</sub> HNAs (B), PS-SO<sub>3</sub>H/3.3PMA-SiO<sub>2</sub> HNAs (C), PS-SO<sub>3</sub>H/5PMA-SiO<sub>2</sub> HNAs (D), and PS-SO<sub>3</sub>H/5PMA-C8-SiO<sub>2</sub> HNAs (E).

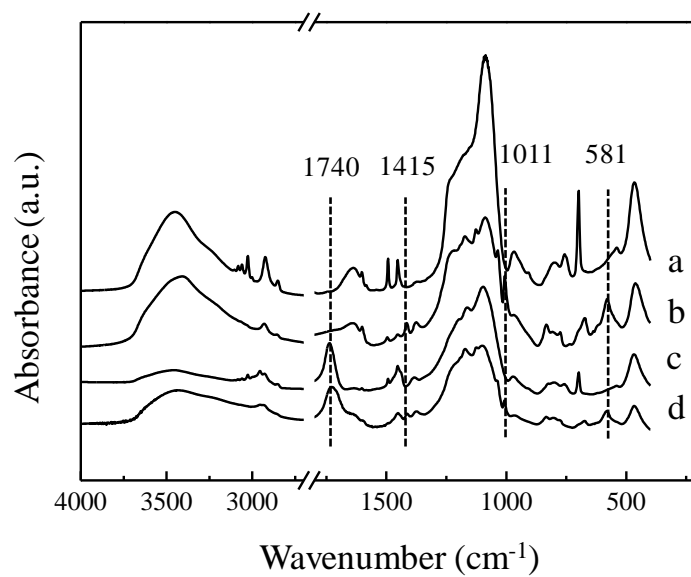

Figure S6. FT-IR spectra of PS/SiO<sub>2</sub> HN<sub>s</sub> (a), PS-SO<sub>3</sub>H/SiO<sub>2</sub> HN<sub>s</sub> (b), PS/5PMA-SiO<sub>2</sub> HN<sub>s</sub> (c) and PS-SO<sub>3</sub>H/5PMA-SiO<sub>2</sub> HN<sub>s</sub> (d)

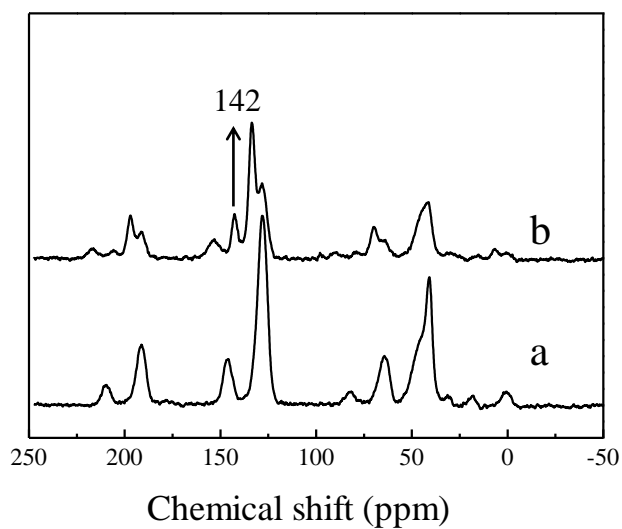

Figure S7. <sup>13</sup>C NMR spectra of PS/SiO<sub>2</sub> HN<sub>s</sub> (a) and PS-SO<sub>3</sub>H/SiO<sub>2</sub> HN<sub>s</sub> (b)

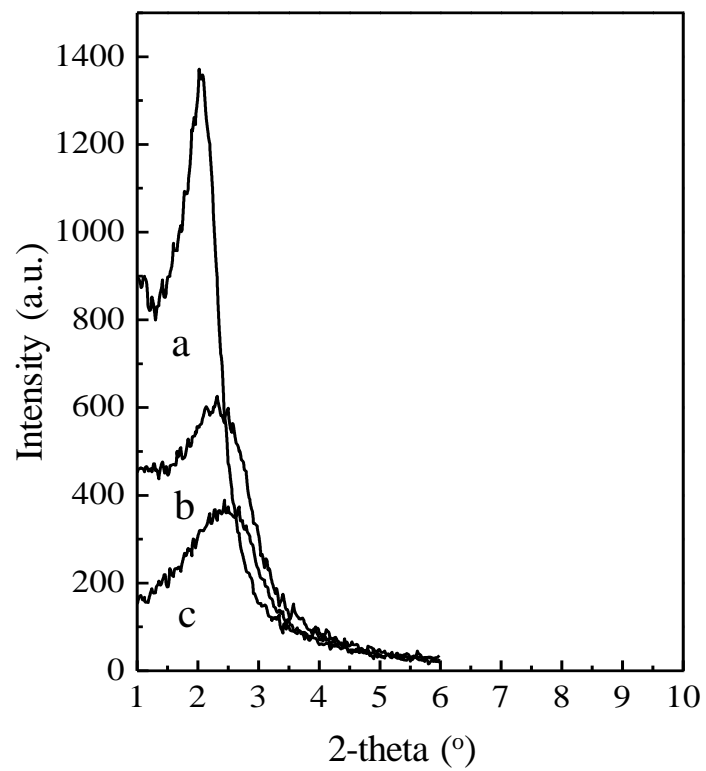

Figure S8. XRD patterns of PS/SiO<sub>2</sub> HNs (a), PS/5PMA-SiO<sub>2</sub> HNs (b) and PS-SO<sub>3</sub>H/5PMA-SiO<sub>2</sub> HNs (c)
